# Supplementary material for: Electrochromic properties of dandelion flower like nickel oxide thin films
Source: Royal Society of Chemistry journal article supplement (doi:10.1039/c2ta00842d), 2012-11-29
Supplement: c2ta00842d.pdf [file c2ta00842d.pdf]

## Electrochromic properties of dandelion flower like nickel oxide thin films

Dhanaji S. Dalavi<sup>a</sup>, Rupesh S. Devan<sup>b</sup>, Raghunath S. Patil<sup>c</sup>, Yuan-Ron. Ma<sup>b</sup>, Myeong-Gil. Kang<sup>d</sup>,  
Jin-Hyeok. Kim<sup>d\*\*</sup> and Pramod S. Patil<sup>a,d\*</sup>

<sup>a</sup>*Thin Film Materials laboratory, Department of Physics, Shivaji University, Kolhapur - 416004, M.S., India*

<sup>b</sup>*Department of Physics, National Dong Hwa University, Hualien 97401, Taiwan*

<sup>c</sup>*Department of Physics, The New College, Kolhapur - 416012, India*

<sup>d</sup>*Department of Materials Science, Chonnam National University, Gwangju, South Korea*

*Corresponding Author: dhanuphysics@gmail.com, psp\_phy@unishivaji.ac.in (P.S. Patil).*

*Tel.: +91-231-2609230; Fax: +91-231-2691533.*

### Fabrication of DFL-NiO based electrochromic Devices

The EC device configuration for DFL-NiO thin film was Glass/ITO/NiO/KOH/ITO/Glass. NiO thin films deposited on ITO coated conducting glass substrate acts as a working electrode and ITO coated conducting glass substrate acts as counter electrode were assembled together with double sided tesco tape of 1.5 mm thickness to produce a sandwich-type electrochromic device. The liquid electrolyte (1M KOH) was filled into the device through a small hole and sealed it with resibond epoxy glue. The EC device was dried in air for 1 day before studying EC performance.

### Characterization

The structural properties of the DFL-NiO thin films were studied from X-ray diffractometer (Regaku Miniflex Model No.600) Cu K $\alpha$  radiation ( $\lambda=1.54$  Å). The fourier transform infrared (FT-IR) spectrum of powder collected from NiO samples were recorded using Perkin-Elmer IR spectrophotometer (model-100) in the spectral range 400–4000cm<sup>-1</sup>. The pellets were prepared by mixing KBr with NiO powder collected by scratching film from glass substrates, in the ratio of 300:1 and then pressing the powder between two pieces of polished steel. The surface morphologies of the DFL-NiO thin films thus produced were characterized by scanning electron microscopy (SEM, JEOL-JSM-6360, Japan). The elemental and structural information of the NiO thin films were analyzed using x-ray photoelectron spectrometer (XPS,

VG Multilab 2000-Thermo Scientific Inc. UK,  $K_{\alpha}$ ) with a microfocus monochromated Al  $K_{\alpha}$  X-ray working with high photonic energies from 0.1 to 3 KeV. All the electrochromic measurements were performed in an electrolyte of 1 M KOH in a conventional three-electrode arrangement comprising NiO thin film as a working electrode, platinum wire as the counter electrode and saturated calomel electrode (SCE) served as the reference electrode using an electrochemical analyzer (model-CHI-400A) by CH Instrument, USA. In-situ transmittance was recorded using a He-Ne Laser ( $\lambda=632.8$  nm), a Si photodiode and a storage oscilloscope. The optical transmission and colorimetric analysis were done with the help UV-Vis spectrophotometer (Shimadzu, model: UV-1800, Japan) in the wavelength range of 300–1100 nm and Shimadzu made color analysis software equipped UV-Vis spectrophotometer by analyzing transmittance spectra of color/bleach state to evaluate  $L^*a^*b^*$  and  $Y_{xy}$  coordinate values.

### Growth Mechanism of DFL-NiO

The DFL-NiO thin films composed of nano-flakes were probably grown by nucleation and growth from small nanocrystals containing divalent metal cations of Ni and O-octahedra. The oxygen octahedra formed of six hydroxyl groups and centered  $Ni^{2+}$  cations share their edges to form two-dimensional (2D) sheets of  $Ni(OH)_2$ , which were formed of even smaller nanocrystals via various interlayer chemical interactions. The ammonia introduced in the reaction not only acts as the complex agent but also plays a key role in the formation of  $Ni(OH)_2$  nanosheets making them very flexible.<sup>1</sup> The possible reaction mechanism formulated is as follows:<sup>2</sup>

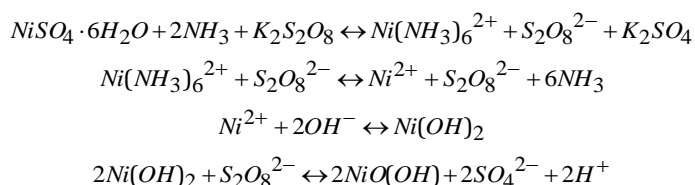

After annealing at 300 °C for 90 min, the mixed phase of  $Ni(OH)_2/NiOOH$  converts into DFL-NiO composed of nano-flakes.

## Fourier Transform infrared (FT-IR) Spectroscopic Studies

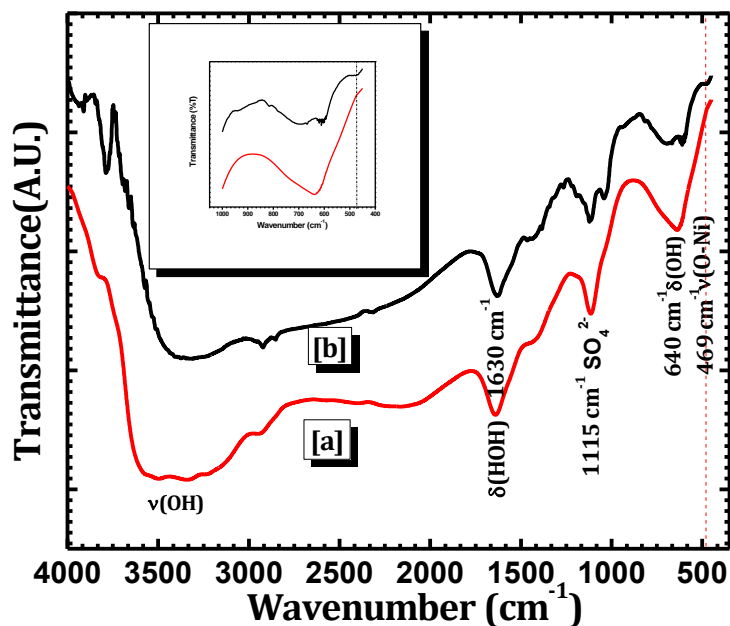

Fig.S1 FT-IR spectra of (a) as prepared and (b) annealed NiO samples scratched from thin films.

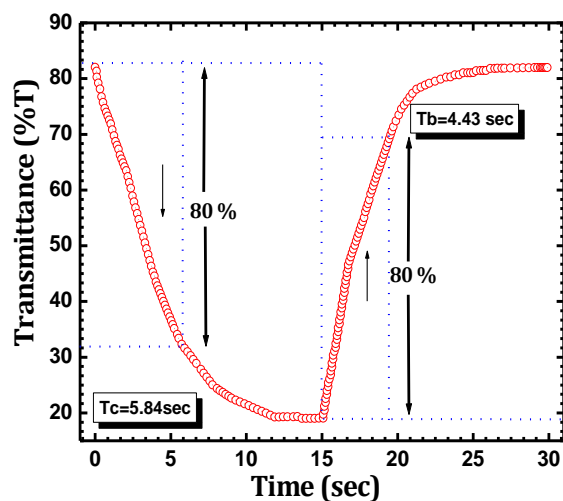

Fig.S2 In-situ transmittance response curve during the first pulse potential cycling of DFL-NiO thin film.

## References:

1. J. T. Sampanthar and H. C. Zeng, J. Am. Chem. Soc., 2002, 124, 6668.
2. X. H. Xia, J. P. Tu, J. Zhang, X. L. Wang, W. K. Zhang and H. Huang, *Sol. Energy. Mater. Sol. Cells.*, 2008, **92**, 628.
